## Cerebral Blood Flow and Oxygen Consumption in the Rat Brain during Extreme Hypercarbia

Leif Berntman, M.D.,\* Nils Dahlgren, M.D.,\* Bo K. Siesjö, M.D.†

The effects of hypercapnia ( $P_{aCO_2}$ , 80, 160 and 300 torr) on cerebral metabolic rate for oxygen ( $CMR_{O_2}$ ) and blood flow (CBF) were evaluated in paralyzed, mechanically ventilated rats by use of a  $^{133}Xe$  modification of the Kety–Schmidt inert-gas technique. Hypercapnic rats ( $P_{aCO_2}$ , 80 torr) maintained on  $N_2O$ , 70 per cent, had a sixfold increase in CBF and a 25 per cent increase in  $CMR_{O_2}$ , which were not prevented by adrenalectomy or decreases in tissue  $O_2$  tensions to near-normal values. Further increases in arterial blood  $CO_2$  tensions were associated with decreases in  $CMR_{O_2}$  to normal ( $P_{aCO_2}$ , 160 torr) or subnormal values ( $P_{aCO_2}$ , 300 torr). In the last situation there was only a threefold increase in CBF. In rats with  $P_{aCO_2}$  about 80 torr that were given propranolol,  $2.5\text{ mg}\cdot\text{kg}^{-1}$ , during  $N_2O$  anesthesia, there was only a threefold increase in CBF, while  $CMR_{O_2}$  decreased to below normocapnic control values. Rats with  $P_{aCO_2}$ , 80 torr given sedative or anesthetic doses of diazepam (ventilated with  $O_2$ , 30 per cent, in  $N_2$ ) also had decreased  $CMR_{O_2}$  values and had a twofold increase in CBF. It is concluded that hypercapnia activates catecholaminergic neurons in the brain, and that this activation increases oxygen consumption. The increase in flow that occurs with hypercapnia is markedly influenced by activity in catecholaminergic neurons. (Key words: Brain: blood flow; carbon dioxide tension; oxygen consumption. Carbon dioxide: hypercarbia. Hypnotics, benzodiazepines: diazepam. Sympathetic nervous system: sympatholytic agents, propranolol.

RESULTS from this laboratory have demonstrated that the cerebral metabolic rate for oxygen ( $CMR_{O_2}$ ) increases in two conditions that involve activation of the sympathoadrenal system. First, when the nitrous oxide supply is discontinued in paralyzed, artificially ventilated rats,  $CMR_{O_2}$  increases to more than 180 per cent of control, with a comparable increase in cerebral blood flow (CBF).<sup>1,2</sup> These increases are prevented by adrenalectomy or by administration of propranolol. Second, recent data demonstrate that, under certain circumstances, a similar increase in  $CMR_{O_2}$  occurs with hypoxia, induced by decreasing arterial blood  $P_{O_2}$  to 25–30 torr in rats during anesthesia with  $N_2O$ , 70 per cent.<sup>3</sup> Although this increase was curtailed by adrenalectomy, all rats maintained on  $N_2O$ , 70 per

cent, whether or not the adrenal glands had been removed, had 20–30 per cent increases in  $CMR_{O_2}$ . Since these increases were blocked by sedative or anesthetic doses of diazepam, they might have been triggered by activation of cerebral catecholaminergic neurons.

Previous studies in man have shown that increases in arterial blood  $P_{CO_2}$  to 50–60 torr are accompanied by increases in CBF at an unchanged  $CMR_{O_2}$ .<sup>4,5</sup> In the rat, increases in  $P_{aCO_2}$  to 70–80 torr have been found to cause a fourfold increase in CBF with no significant change in  $CMR_{O_2}$ .<sup>6</sup> To our knowledge, the effects of even higher  $CO_2$  tensions have not been studied. Since hypercapnia is known to cause sympathoadrenal activation,<sup>7–9</sup> we decided to reinvestigate the effects of hypercapnia ( $P_{aCO_2}$  70–80 torr) on  $CMR_{O_2}$  and CBF. Our approach differed from previous ones in several important respects. First, we used a CBF technique that facilitates measurements at very high flow rates.<sup>3</sup> Second, moderate hypercarbia (70–80 torr) was also induced in animals from which the adrenal glands had been removed, in those given propranolol or diazepam, and in those in which tissue oxygen tensions were prevented from increasing. Third, very high  $CO_2$  tensions, as induced by administration of  $CO_2$ , 20 and 40 per cent, were also studied.

### Methods

Male Wistar rats, each weighing 320–400 g, were allowed free access to pellet food and water until the day of operation. Anesthesia was induced with halothane, 2–3 per cent. Following tracheotomy, the animals were immobilized with *d*-tubocurarine chloride,  $0.5\text{ mg}\cdot\text{kg}^{-1}$ , iv, and their lungs artificially ventilated. Most animals were maintained on  $N_2O$ , 70 per cent, and  $O_2$ , 30 per cent, until hypercapnia was induced. In a few animals, diazepam was given in sedative ( $2.25\text{ mg}\cdot\text{kg}^{-1}$ ) or anesthetic ( $7.5\text{ mg}\cdot\text{kg}^{-1}$ ) doses, iv, as described previously,<sup>10</sup> and ventilation was continued with  $N_2$ , 70 per cent, and  $O_2$ , 30 per cent. In some animals maintained on  $N_2O$ , 70 per cent, and  $O_2$ , 30 per cent, propranolol,  $2.5\text{ mg}\cdot\text{kg}^{-1}$ , was given iv. In one group of animals inspired  $O_2$  concentration was decreased to give  $P_{aO_2}$  50–60 torr. In all animals ventilation was adjusted to give arterial blood  $CO_2$  tensions of 35–40 torr. Body temperature, measured in the rectum, was maintained close to 37°C by external heating.

\* Senior Resident in Anaesthesia, Department of Anaesthesia, University Hospital, Lund.

† M.R.C. Professor in Brain Metabolism, Head of M.R.C. Cerebral Metabolism Group, E-blocket, University Hospital, Lund.

Received from the Laboratory of Experimental Brain Research, E-blocket and Department of Anaesthesia, University Hospital, S-221 85 Lund, Sweden. Accepted for publication July 12, 1978. Supported by grants from the Swedish Medical Research Council (Project No. 14X-263) and from USPHS Grant No. 5 R01 NS07838 from NIH.

Address reprint requests to Dr. Siesjö, Research Department 4, E-Blocket, University Hospital, S-221, 85 Lund, Sweden.

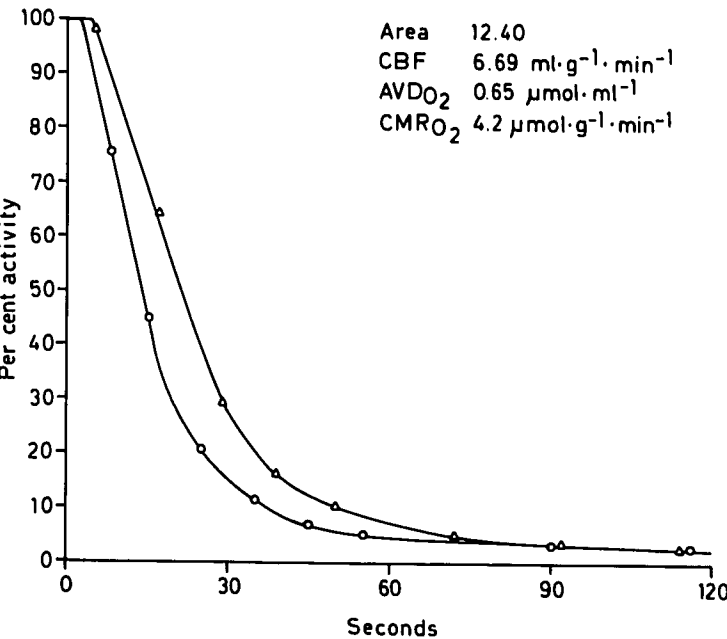

FIG. 1. Example of a <sup>133</sup>Xe-desaturation curve where cerebral blood flow exceeds 5 ml·g<sup>-1</sup>·min<sup>-1</sup>. O denotes arterial samples and Δ, samples from the superior sagittal sinus. All <sup>133</sup>Xe activities are given as percentages of the venous values measured at the end of the saturation period.

Preparations for CBF measurements included cannulation of both femoral arteries (for blood pressure recording and sampling of arterial blood) and one femoral vein (for iv injections and infusions of donor blood), as well as exposure of the caudad portion of the superior sagittal sinus.

A few rats were used for clinical evaluation of the effect of hypercapnia combined with propranolol or diazepam. These animals were anesthetized with halothane, 2–3 per cent, and catheters were inserted into a tail artery and vein for blood sampling and infusions. The animals were allowed to recover for at least an hour in an airtight plastic box, which could be per-

fused with any desired gas mixture. The animals were then given either propranolol, 2.5 mg·kg<sup>-1</sup>, iv, and exposed to CO<sub>2</sub>, 7 per cent, and O<sub>2</sub>, 30 per cent, in N<sub>2</sub>O, or diazepam, 2.25 mg·kg<sup>-1</sup>, and were exposed to CO<sub>2</sub>, 7 per cent, and O<sub>2</sub>, 30 per cent, in N<sub>2</sub>. They were observed for wakefulness, motor activity, reactions to pain and sensory stimulation, and reflexes, and were compared with unmedicated rats in the same box.

Hypercapnia was induced by adding CO<sub>2</sub> to the insufflated gas mixture for 30 min in amounts sufficient to increase arterial blood CO<sub>2</sub> tensions to 80, 160, or 300 torr, with corresponding decreases in N<sub>2</sub>O concentration. Preliminary experiments with unanesthetized, spontaneously breathing rats showed that PaCO<sub>2</sub> 300 torr induced unconsciousness and abolished reaction to pain. For this reason, the nitrous oxide supply was withdrawn a few minutes after induction of hypercapnia. In order to prevent an excessive increase in arterial pressure (> 200 torr), and the development of cardiovascular failure, a 3–5-ml volume of blood was slowly withdrawn, and the CO<sub>2</sub> tension was gradually increased over 3–5 min. The hypercapnia was then maintained for 30 min.

Cerebral blood flow was measured using a <sup>133</sup>Xe modification of the Kety–Schmidt technique.<sup>6,11,12</sup> In general principle, the brains were saturated with <sup>133</sup>Xe over 20 min by connecting a rubber bag containing a gas mixture with <sup>133</sup>Xe to the inlet of the respirator, and arterial and cerebral venous blood samples were taken for measurements of <sup>133</sup>Xe activity and oxygen content (C<sub>O<sub>2</sub></sub>) at the end of saturation. Desaturation was started by disconnecting the rubber bag, and additional arterial and cerebral venous blood samples were collected during the desaturation period. CBF was

TABLE 1. Body Temperatures, Mean Arterial Blood Pressures (MABP), and Arterial Blood Gas and pH Values in Rats Exposed to CO<sub>2</sub>, 7, 20, and 40 Per Cent, in the Insufflated Gas Mixture (Means ± SEM)

|                                    | Control<br>Normocapnia | Hypercapnia                   |                                |                                |
|------------------------------------|------------------------|-------------------------------|--------------------------------|--------------------------------|
|                                    |                        | CO <sub>2</sub> 7<br>Per Cent | CO <sub>2</sub> 20<br>Per Cent | CO <sub>2</sub> 40<br>Per Cent |
| Number of rats                     | 15                     | 6                             | 6                              | 6                              |
| Temperature (C)                    | 37.0<br>± 0.1          | 36.9<br>± 0.3                 | 37.0<br>± 0.3                  | 36.5<br>± 0.3                  |
| MABP (torr)                        | 140<br>± 3             | 138<br>± 4                    | 147<br>± 2                     | 127*<br>± 3                    |
| P <sub>CO<sub>2</sub></sub> (torr) | 38.8<br>± 0.5          | 81*<br>± 3                    | 156*<br>± 3                    | 296*<br>± 10                   |
| P <sub>O<sub>2</sub></sub> (torr)  | 125<br>± 5             | 120<br>± 6                    | 113<br>± 7                     | 144<br>± 13                    |
| pH                                 | 7.38<br>± 0.01         | 7.12*<br>± 0.01               | 6.92*<br>± 0.02                | 6.61*<br>± 0.04                |

\* Significant difference from control value, P < 0.05.

FIG. 2. Individual CBF and  $\text{CMR}_{\text{O}_2}$  values plotted against arterial blood  $\text{P}_{\text{CO}_2}$ . The horizontal uninterupted lines represent the mean values and the interrupted lines the 95 per cent confidence intervals for  $\text{CMR}_{\text{O}_2}$  and CBF, respectively, for the control group ( $\text{Pa}_{\text{CO}_2}$  40 torr).

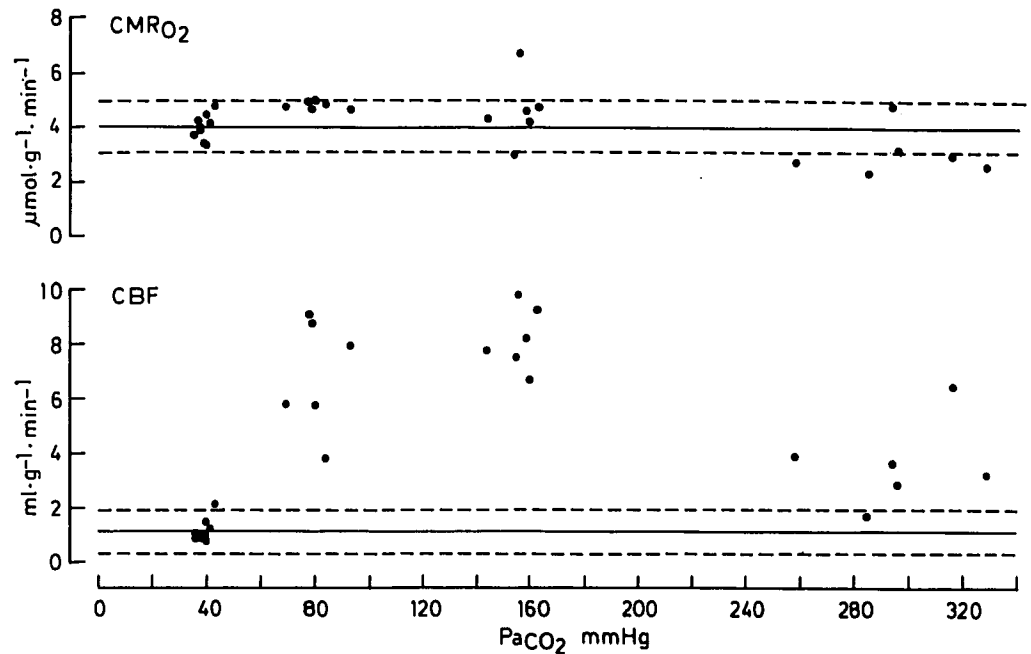

then calculated from the arterial and cerebral venous blood values for  $^{133}\text{Xe}$  activity, using the trapezoid rule.  $\text{CMR}_{\text{O}_2}$  was derived by multiplying the CBF value by the mean of the values for arteriovenous oxygen difference  $[\text{C(a-v)}_{\text{O}_2}]$ . Recently, the method has been technically modified so as to allow accurate estimation of CBF even at very high flow rates.<sup>3</sup> These modifications were used in the present experiments, and in addition, mean  $\text{C(a-v)}_{\text{O}_2}$  was calculated from at least two values, obtained just before and during the first minute of desaturation. When only two  $\text{C(a-v)}_{\text{O}_2}$  values were obtained, and these differed by more than 10 per cent, the experiment was discarded.

Arterial blood  $\text{P}_{\text{CO}_2}$  and  $\text{pH}$  values were measured using microelectrodes<sup>‡</sup> with appropriate corrections for any deviation in body temperature from 37 C. To allow measurements of  $\text{P}_{\text{CO}_2}$  in animals exposed to 40 per cent  $\text{CO}_2$ , the  $\text{P}_{\text{CO}_2}$  electrode was calibrated with gas mixtures of comparable  $\text{P}_{\text{CO}_2}$ , and samples were analyzed within 2–3 min following withdrawal.<sup>13</sup> Arterial and cerebral venous blood  $\text{CO}_2$  values were measured in 25- $\mu\text{l}$  samples using the polarographic method of Fabel and Lübbers.<sup>14,15</sup>  $^{133}\text{Xe}$  activity in blood was analyzed in a gamma counter as described elsewhere.<sup>12</sup>

Statistical differences were calculated using the Student  $t$  test for unpaired data. A  $P$  value of 0.05 was regarded as significant.

### Results

In rats that had intact adrenal glands, increases in  $\text{Pa}_{\text{CO}_2}$  to about 80 torr decreased plasma  $\text{pH}$  to about

7.1 (table 1). Arterial blood pressure was similar to that measured in normocapnic animals maintained on  $\text{N}_2\text{O}$ , 70 per cent.  $\text{Pa}_{\text{O}_2}$  exceeded 95 torr in every animal. Arterial  $\text{pH}$  decreased further as  $\text{Pa}_{\text{CO}_2}$  was increased. At the highest  $\text{Pa}_{\text{CO}_2}$  value, blood pressure decreased but still exceeded 120 torr in every animal.

Results for CBF and  $\text{CMR}_{\text{O}_2}$  obtained at flow rates exceeding  $3\text{--}4\text{ ml}\cdot\text{g}^{-1}\cdot\text{min}^{-1}$  are critically dependent on the CBF technique. Even when CBF exceeded  $5\text{ ml}\cdot\text{g}^{-1}\cdot\text{min}^{-1}$ , it was possible accurately to assess the area between the desaturation curves for arterial and cerebrovenous blood (fig. 1). At these flow rates, the difference between venous and arterial blood  $^{133}\text{Xe}$  activities decreased to zero within 90 sec following the

TABLE 2. Values of Arterial Oxygen Content ( $\text{Ca}_{\text{O}_2}$ ), Arteriovenous Difference for Oxygen ( $\text{C(a-v)}_{\text{O}_2}$ ), Cerebral Blood Flow (CBF) and Cerebral Metabolic Rate for Oxygen Corrected to 37 C ( $\text{CMR}_{\text{O}_{2m}}$ )<sup>31</sup> in Rats Exposed to  $\text{CO}_2$ , 7, 20, and 40 Per Cent, in the Insufflated Gas Mixture (Means  $\pm$  SEM)

|                                                                                           | Control<br>Normo-<br>capnia | Hypercapnia                 |                              |                              |
|-------------------------------------------------------------------------------------------|-----------------------------|-----------------------------|------------------------------|------------------------------|
|                                                                                           |                             | $\text{CO}_2$ 7<br>Per Cent | $\text{CO}_2$ 20<br>Per Cent | $\text{CO}_2$ 40<br>Per Cent |
| Number of rats                                                                            | 15                          | 6                           | 6                            | 6                            |
| $\text{Ca}_{\text{O}_2}$ ( $\mu\text{mol}\cdot\text{ml}^{-1}$ )                           | 9.83<br>$\pm 0.14$          | 8.46*<br>$\pm 0.33$         | 7.57*<br>$\pm 0.35$          | 8.47*<br>$\pm 0.33$          |
| $\text{C(a-v)}_{\text{O}_2}$<br>( $\mu\text{mol}\cdot\text{ml}^{-1}$ )                    | 3.76<br>$\pm 0.17$          | 0.78*<br>$\pm 0.11$         | 0.55*<br>$\pm 0.04$          | 0.95*<br>$\pm 0.15$          |
| CBF<br>( $\text{ml}\cdot\text{g}^{-1}\cdot\text{min}^{-1}$ )                              | 1.11<br>$\pm 0.09$          | 6.84*<br>$\pm 0.85$         | 8.21*<br>$\pm 0.47$          | 3.60*<br>$\pm 0.64$          |
| $\text{CMR}_{\text{O}_{2m}}$<br>( $\mu\text{mol}\cdot\text{g}^{-1}\cdot\text{min}^{-1}$ ) | 4.00<br>$\pm 0.13$          | 4.88*<br>$\pm 0.09$         | 4.59<br>$\pm 0.55$           | 3.14*<br>$\pm 0.38$          |

\* Significant difference from control value,  $P < 0.05$ .

<sup>‡</sup> Eschweiler and Company, Kiel, and Radiometer, Copenhagen, Denmark.

TABLE 3. Values of Mean Arterial Blood Pressure (MABP), Arterial Blood Gas and pH, Venous Oxygen Tension in the Superior Sagittal Sinus (PvO<sub>2</sub>), Arteriovenous Differences for Oxygen (C(a - v)<sub>O<sub>2</sub></sub>), Cerebral Blood Flow (CBF), and Cerebral Metabolic Rate for Oxygen Corrected to 37 C (CMR<sub>O<sub>2</sub></sub>) in Normoxic and Moderately Hypoxic Rats Exposed to CO<sub>2</sub>, 7 Per Cent, in the Insufflated Gas Mixture (Means ± SEM)

|                                                                         | CO <sub>2</sub> 7 Per Cent<br>Normoxia | CO <sub>2</sub> 7 Per Cent<br>Hypoxia |
|-------------------------------------------------------------------------|----------------------------------------|---------------------------------------|
| Number of rats                                                          | 6                                      | 6                                     |
| Temperature (C)                                                         | 36.9 ± 0.3                             | 37.2 ± 0.2                            |
| MABP (torr)                                                             | 138 ± 4                                | 140 ± 5                               |
| PaCO <sub>2</sub> (torr)                                                | 81 ± 3                                 | 85 ± 3                                |
| PaO <sub>2</sub> (torr)                                                 | 120 ± 6                                | 56 ± 4*                               |
| PvO <sub>2</sub> (torr)                                                 | 70 ± 4†                                | 51 ± 5*                               |
| pH                                                                      | 7.12 ± 0.01                            | 7.06 ± 0.004*                         |
| C(a - v) <sub>O<sub>2</sub></sub> (μmol·ml <sup>-1</sup> )              | 0.78 ± 0.11                            | 0.79 ± 0.07                           |
| CBF (ml·g <sup>-1</sup> ·min <sup>-1</sup> )                            | 6.84 ± 0.85                            | 7.06 ± 0.68                           |
| CMR <sub>O<sub>2</sub></sub> (μmol·g <sup>-1</sup> ·min <sup>-1</sup> ) | 4.88 ± 0.09                            | 5.29 ± 0.31                           |

\* Significant difference from normoxic value, *P* < 0.05.  
† From Eklöf *et al.*<sup>32</sup>

start of desaturation. Increases in PaCO<sub>2</sub> to 80 torr caused a sixfold increase in CBF and a moderate increase in CMR<sub>O<sub>2</sub></sub> (fig. 2, table 2). There was a considerable scatter in CBF, less so in CMR<sub>O<sub>2</sub></sub> values. Figure 2 illustrates data obtained in nine control rats, collected before the present study was performed. During the course of the study six more animals were studied. Since the results were identical the data from the two groups were pooled (table 2). At PaCO<sub>2</sub> 156 torr, mean CBF had increased seven- to eightfold, and CMR<sub>O<sub>2</sub></sub> was not different from control. One animal had an unusually high CMR<sub>O<sub>2</sub></sub> value. When results from this animal are excluded, mean CMR<sub>O<sub>2</sub></sub> was identical to the control value. At PaCO<sub>2</sub> 296 torr, there were statistically significant decreases in CMR<sub>O<sub>2</sub></sub> and CBF as compared with those measured at PaCO<sub>2</sub> 80–160 torr. For rats having PaCO<sub>2</sub> values close to 80 torr, the mean value for CBF was somewhat lower than that obtained at PaCO<sub>2</sub> 160 torr. However, since the latter animals had an average blood pressure that was 10 torr higher, the cerebrovascular resistances should have been about equal. In other words, maximal vasodilatation probably existed when PaCO<sub>2</sub> was increased to about 80 torr.

In the six animals whose adrenal glands had been removed, mean PaCO<sub>2</sub> was 85 torr (± 3 torr, SEM). In this group, CMR<sub>O<sub>2</sub></sub> was 5.60 ± 0.32 μmol·g<sup>-1</sup>·min<sup>-1</sup>, and CBF was 5.24 ± 0.55 ml·g<sup>-1</sup>·min<sup>-1</sup>. Thus, CMR<sub>O<sub>2</sub></sub> was significantly increased above the normocapnic control value while CBF was five times normal. Obviously, adrenalectomy failed to lower CMR<sub>O<sub>2</sub></sub> to normal or subnormal values, and had no influence on the CBF response.

It has been speculated that there may be a direct relationship between tissue P<sub>O<sub>2</sub></sub> and oxygen utilization.<sup>16,17</sup> Since the increase in CBF during hypercapnia

increases tissue oxygen concentration, separate animals were exposed to hypercapnia at decreased arterial blood P<sub>O<sub>2</sub></sub>. However, decreases in arterial and cerebrovenous (and hence tissue) P<sub>O<sub>2</sub></sub> values did not influence the CMR<sub>O<sub>2</sub></sub> derived (table 3).

Since it could be suspected that the increase in CMR<sub>O<sub>2</sub></sub> was related to increased activity in cerebral catecholaminergic neurons (see discussion), hypercapnia was induced in animals given propranolol or diazepam (table 4). To exclude the possibility of a variable response to hypercapnia, four additional animals were studied at N<sub>2</sub>O, 70 per cent, and O<sub>2</sub>, 30 per cent. Since the CBF and CMR<sub>O<sub>2</sub></sub> values obtained (6.72 ± 1.10 ml·g<sup>-1</sup>·min<sup>-1</sup> and 4.41 ± 0.42 μmol·g<sup>-1</sup>·min<sup>-1</sup>, respectively) did not deviate significantly from those given in table 2, the hypercapnic control values were pooled. The results show that administration of propranolol or diazepam had pronounced effects on CBF and CMR<sub>O<sub>2</sub></sub> (table 5). Thus, during hypercapnia propranolol decreased CBF and CMR<sub>O<sub>2</sub></sub>, the latter decreasing to values below those measured in normocapnic controls (Table 2). In animals given diazepam, the results were similar but CBF was even further reduced.

All unventilated animals made hypercapnic had arterial blood gas and pH values comparable to those observed during artificial ventilation. The rats given propranolol showed moderate sedation when made hypercapnic (PaCO<sub>2</sub> 80 torr), which was more pronounced than that of control rats exposed to the N<sub>2</sub>O-

TABLE 4. Values of Body Temperature, Mean Arterial Blood Pressure (MABP), and Arterial Blood P<sub>CO<sub>2</sub></sub>, P<sub>O<sub>2</sub></sub> and pH in Hypercapnic Rats with and without Administration of Propranolol or Diazepam (Means ± SEM)

|                                    | Hypercapnia (7 Per Cent CO <sub>2</sub> ) |                                          |             |             |
|------------------------------------|-------------------------------------------|------------------------------------------|-------------|-------------|
|                                    | "Control" (Hypercapnia)                   | Propranolol 2.5 mg·kg <sup>-1</sup> , iv | Diazepam    |             |
|                                    |                                           |                                          | Sedative    | Anesthetic  |
| Number of rats                     | 10                                        | 4                                        | 5           | 6           |
| Temperature (C)                    | 36.9 ± 0.2                                | 36.9 ± 0.2                               | 37.2 ± 0.1  | 36.6 ± 0.4  |
| MABP (torr)                        | 147 ± 4                                   | 164 ± 6*                                 | 148 ± 6     | 146 ± 12    |
| P <sub>CO<sub>2</sub></sub> (torr) | 80 ± 2                                    | 79 ± 1                                   | 79 ± 1      | 80 ± 3      |
| P <sub>O<sub>2</sub></sub> (torr)  | 120 ± 4                                   | 105 ± 10                                 | 108 ± 6     | 104 ± 10    |
| pH                                 | 7.01 ± 0.01                               | 7.10* ± 0.02                             | 7.04 ± 0.04 | 7.01 ± 0.03 |

All animals' lungs were ventilated with CO<sub>2</sub>, 7 per cent, and O<sub>2</sub>, 30 per cent. Those serving as controls or given propranolol also received N<sub>2</sub>O, 63 per cent, while the diazepam-injected rats were given N<sub>2</sub>, 63 per cent.  
\* Significant difference from control value, *P* < 0.05.

containing gas mixture. Propranolol-injected animals lay in a prone position and had slow reactions to sound and pain and a slow righting reflex.

Diazepam with hypercapnia ( $P_{aCO_2}$  80 torr) caused excellent sedation. The animals lay in a lateral position and had no reaction to sound, a weak reaction to pain, and no righting reflex. Thus, the combination of hypercapnia and a sedative dose of diazepam clinically resembled the effect of an anesthetic dose of diazepam,<sup>10</sup> and this synergistic effect disappeared when the rats were allowed to breathe room air again.

### Discussion

The technique described by Kety and Schmidt<sup>11</sup> forms the basis of most of our knowledge of cerebral blood flow and oxygen utilization, and has been used in a large number of clinical and experimental studies. Since the method is based on the law of conservation of matter (Fick principle) it should give a quantitative measure of CBF and  $CMR_{O_2}$ . However, there are some assumptions involved. Most importantly, it is necessary that 1) CBF remain constant during the course of the measurement, 2) no arteriovenous shunt exist, 3) contamination of venous blood from extracerebral tissues be slight, and 4) the tissue not contain slowly perfused masses. It should be emphasized that even when these requirements are fulfilled one obtains a measure of oxygen utilization but not necessarily of energy production. Thus, when there is uncoupling of oxidative phosphorylation there is no strict parallelism between oxygen consumption and rate of energy flux (see below).

There is presently no evidence that arteriovenous shunts normally exist in the brain or that they may be formed with hypercapnia. Since repeated measurements of  $C(a-v)_{O_2}$  can establish that CBF is constant, our main concerns are assumptions 3 and 4. As discussed elsewhere,<sup>12,18</sup> there is evidence that slowly perfused areas do not exist in the rat brain, and that any extracerebral contamination of venous blood is small. Thus, the main problem is to assess CBF accurately at the high flow rates obtained with hypercapnia. Results obtained with the modified and improved <sup>133</sup>Xe technique have made it necessary to revise two of our previous findings. First, under control conditions ( $N_2O$ , 70–75 per cent,  $P_{aCO_2}$  35–40 torr),  $CMR_{O_2}$  in the rat is close to  $4.0 \mu\text{mol} \cdot \text{g}^{-1} \cdot \text{min}^{-1}$ , i.e., about 10 per cent less than previously reported.<sup>6</sup> Values around  $4 \mu\text{mol} \cdot \text{g}^{-1} \cdot \text{min}^{-1}$  have been repeatedly obtained before, at the time, and after the present series of experiments were performed. It seems clear that the difference is due to the fact that with the modified technique the area between the arterial and cerebrovenous curves for <sup>133</sup>Xe activity is more accurately

TABLE 5. Values of Arterial Oxygen Content ( $Ca_{O_2}$ ), Arteriovenous Oxygen Difference ( $C(a-v)_{O_2}$ ), Cerebral Blood Flow (CBF) and Cerebral Metabolic Rate for Oxygen ( $CMR_{O_2}$ ) in Hypercapnic Rats with and without Administration of Propranolol or Diazepam (Means  $\pm$  SEM)

|                                                                              | Hypercapnia (7 Per Cent $CO_2$ ) |                                                |                     |                     |
|------------------------------------------------------------------------------|----------------------------------|------------------------------------------------|---------------------|---------------------|
|                                                                              | "Control"<br>(Hypercapnia)       | Propranolol<br>2.5 mg·kg <sup>-1</sup> ,<br>iv | Diazepam            |                     |
|                                                                              |                                  |                                                | Sedative            | Anesthetic          |
| Number of rats                                                               | 10                               | 4                                              | 5                   | 6                   |
| $Ca_{O_2}$ ( $\mu\text{mol} \cdot \text{ml}^{-1}$ )                          | 8.97<br>$\pm 0.30$               | 8.62<br>$\pm 0.28$                             | 8.31<br>$\pm 0.30$  | 7.58*<br>$\pm 0.55$ |
| $C(a-v)_{O_2}$<br>( $\mu\text{mol} \cdot \text{ml}^{-1}$ )                   | 0.74<br>$\pm 0.07$               | 0.86<br>$\pm 0.05$                             | 1.76*<br>$\pm 0.20$ | 1.36*<br>$\pm 0.20$ |
| CBF<br>( $\text{ml} \cdot \text{g}^{-1} \cdot \text{min}^{-1}$ )             | 6.79<br>$\pm 0.63$               | 3.87*<br>$\pm 0.35$                            | 2.04*<br>$\pm 0.23$ | 2.44*<br>$\pm 0.59$ |
| $CMR_{O_2}$<br>( $\mu\text{mol} \cdot \text{g}^{-1} \cdot \text{min}^{-1}$ ) | 4.69<br>$\pm 0.19$               | 3.33*<br>$\pm 0.23$                            | 3.35*<br>$\pm 0.17$ | 2.91*<br>$\pm 0.18$ |

All animals' lungs were ventilated with  $CO_2$ , 7 per cent, and  $O_2$ , 30 per cent. Those serving as controls or given propranolol also received  $N_2O$ , 63 per cent, while the diazepam-injected rats were given  $N_2$ , 63 per cent.

\* Significant difference from control value,  $P < 0.05$ .

assessed during the initial period of desaturation. Second, there is a moderate but significant increase in  $CMR_{O_2}$  at  $P_{aCO_2}$  values around 80 torr. In view of the facts that similar results were obtained in four separate groups of animals (two groups of intact rats on different occasions, one group in which the adrenal glands were removed, and one group with moderate hypoxia), and that the clearance curves could be regularly resolved as shown in figure 1, we conclude that the present data more accurately describe the relationship between  $P_{CO_2}$  and  $CMR_{O_2}$ .

The present results thus differ from those previously reported for man.<sup>4,5</sup> Part of this discrepancy could be due to the fact that the increase in  $P_{CO_2}$  in our study (about 40 torr) was considerably greater than those in the studies in man (9–13 torr). However, differences in technique and in anesthesia could have contributed. In one study<sup>4</sup> CBF was calculated without extrapolation of arteriovenous differences in inert gas concentration to infinity. There is evidence that such a calculation overestimates CBF and  $CMR_{O_2}$  at normocapnia, but less so at hypercapnia.<sup>19–21</sup> In other words, had extrapolation been performed, the ratio of the  $CMR_{O_2}$  values in hypercapnia and normocapnia should have increased (see figure 1 in reference 4). In the other study,<sup>5</sup>  $CMR_{O_2}$  during hypercapnia did not change significantly, but the mean value was about 15 per cent lower than control. It cannot be excluded that the anesthesia used (halothane, 1.2 per cent) influenced the results, which are not different from those obtained in our animals given diazepam or

propranolol. Thus, results obtained in man are not necessarily inconsistent with the present results.

There appears to have been no previous report of  $CMR_{O_2}$  or CBF values at  $CO_2$  tensions higher than about 80 torr. Extensive data demonstrate that such hypercapnia gives rise to pronounced changes in function. Thus, whereas excitability (measured as threshold to electroshock seizures) is decreased at  $CO_2$  concentrations below 25 per cent, concentrations of about 30 per cent may elicit spontaneous seizures, and those exceeding 40 per cent are accompanied by anesthesia.<sup>22</sup> The present results show that when  $Pa_{CO_2}$  is increased in steps above 80 torr there are gradual decreases in  $CMR_{O_2}$  and CBF. However, rats exposed to  $Pa_{CO_2}$  300 torr had  $CMR_{O_2}$  values that were decreased by only 20–25 per cent below normocapnic control values. These results may reflect the fact that, whatever the level of consciousness, high  $CO_2$  tensions tend to increase  $CMR_{O_2}$ .

Since the peripheral effects of hypercapnia include activation of the sympathoadrenal system with resultant release of adrenal catecholamines,<sup>7–9,23</sup> it seemed possible that such activation could contribute to the increase in  $CMR_{O_2}$ . However, since removal of the adrenal glands did not affect  $CMR_{O_2}$  or CBF, it appeared more likely that the mechanisms were intrinsic. In parallel studies, we could show that hypercapnia leads to an increase in the rate of hydroxylation of tyrosine to DOPA in the brain, and that this effect is not blocked by a decrease in  $Pa_{O_2}$ .<sup>24</sup> In contrast, such a decrease in  $P_{O_2}$  prevented the increase in hydroxylation of tryptophane that occurs with hypercapnia at normal  $P_{O_2}$  values. Working on the assumptions that hypercapnia increased catecholamine turnover in the brain, and that catecholamines induce increases in  $CMR_{O_2}$  and CBF,<sup>25–27</sup> the effects of propranolol and those of diazepam were tested. Propranolol has previously been shown to prevent increases in  $CMR_{O_2}$  and CBF due to catecholamines.<sup>25–27</sup> There are reasons to believe that diazepam should act similarly, although the mechanisms may be different. Thus, the drug has been reported to prevent an increase in cerebral norepinephrine turnover in stressful situations, probably via an effect on locus coeruleus neurons.<sup>28,29</sup>

The present results show that, during hypercapnia, both propranolol and diazepam decreased  $CMR_{O_2}$  to subnormal values and curtailed the increases in CBF. Previous results from the laboratory had shown that when propranolol,  $2.5 \text{ mg} \cdot \text{kg}^{-1}$ , is given to rats maintained on  $N_2O$ , 70 per cent, and  $O_2$ , 30 per cent, or when diazepam in sedative or anesthetic doses ( $2.25$  or  $7.5 \text{ mg} \cdot \text{kg}^{-1}$ , iv, followed by infusion of  $4.5$  or  $15 \text{ mg} \cdot \text{kg} \cdot \text{h}^{-1}$ , respectively) is administered to animals ventilated with  $N_2$ , 70 per cent, and  $O_2$ , 30 per cent,

there is no significant change in  $CMR_{O_2}$ , but a decrease in CBF following diazepam administration.<sup>10,30</sup> It may seem paradoxical that the drugs should decrease  $CMR_{O_2}$  in hypercapnic but not in normocapnic situations. However, the results may be explained if it is assumed that one basic effect of increased  $CO_2$  tensions is to depress oxygen uptake of cortical cells, that this effect is masked by activation of catecholaminergic neurons whose activity secondarily increases  $CMR_{O_2}$ , and that propranolol and diazepam, by preventing this activation, unmask the inhibitory effects of hypercapnia on cortical cells.

The authors are grateful to Gunilla Gidö for skillful technical assistance.

### References

1. Carlsson C, Hägerdal M, Siesjö BK: Increase in cerebral oxygen uptake and blood flow in immobilization stress. *Acta Physiol Scand* 95:206–208, 1975
2. Carlsson C, Hägerdal M, Kaasik AE, et al: A catecholamine-mediated increase in cerebral oxygen uptake during immobilization stress in rats. *Brain Res* 119:223–231, 1977
3. Berntman L, Carlsson C, Siesjö BK: Cerebral oxygen consumption and blood flow in hypoxia: Influence of sympathoadrenal activation. *Stroke* (in press)
4. Kety SS, Schmidt CF: The effect of altered arterial tensions of carbon dioxide and oxygen on cerebral blood flow and cerebral oxygen consumption of normal young men. *J Clin Invest* 27:484–491, 1948
5. Cohen PJ, Wollman H, Alexander SC, et al: Cerebral carbohydrate metabolism in man during halothane anesthesia. *ANESTHESIOLOGY* 25:185–191, 1964
6. Eklöf B, Lassen NA, Nilsson L, et al: Blood flow and metabolic rate for oxygen in the cerebral cortex of the rat. *Acta Physiol Scand* 88:587–589, 1973
7. Tenney SM: Sympatho-adrenal activation by carbon dioxide and the inhibitory effect of carbonic acid on epinephrine response. *Am J Physiol* 187:341–346, 1956
8. Morris ME, Miller RA: Blood pH/plasma catecholamine relationships: Respiratory acidosis. *Br J Anaesth* 34:672–681, 1962
9. Nahas GG, Zagury D, Milhaud A, et al: Acidemia and catecholamine output of the isolated canine adrenal gland. *Am J Physiol* 213:1186–1192, 1967
10. Carlsson C, Hägerdal M, Kaasik AE, et al: The effects of diazepam on cerebral blood flow and oxygen consumption in rats and its synergistic interaction with nitrous oxide. *ANESTHESIOLOGY* 45:319–325, 1976
11. Kety SS, Schmidt CF: The nitrous oxide method for the quantitative determination of cerebral blood flow in man: Theory, procedure and normal values. *J Clin Invest* 27:476–483, 1948
12. Norberg K, Siesjö BK: Quantitative measurement of blood flow and oxygen consumption in the rat brain. *Acta Physiol Scand* 91:154–164, 1974
13. Siesjö BK, Folbergrová J, MacMillan V: The effect of hypercapnia upon intracellular pH in the brain, evaluated by the bicarbonate-carbonic acid method and from the creatine phosphokinase equilibrium. *J Neurochem* 19:2483–2495, 1972
14. Fabel H, Lübbers DW: Eine schnelle Mikromethode zur serien-

- mässigen Bestimmungen der O<sub>2</sub> Konzentration im Blut. *Pflügers Arch* 281:32–33, 1964
15. Borgström L, Hägerdal M, Lewis L, et al: Polarographic determination of total oxygen content in small blood samples. *Scand J Clin Lab Invest* 34:375–380, 1974
16. Jöbsis FF: Oxidative metabolism at low P<sub>O<sub>2</sub></sub>. *Fed Proc* 31:1404–1413, 1972
17. Rosenthal M, LaManna JC, Jöbsis FF, et al: Effects of respiratory gases on cytochrome *a* in intact cerebral cortex: Is there a critical P<sub>O<sub>2</sub></sub>? *Brain Res* 108:143–154, 1976
18. Nilsson B, Siesjö BK: A method for determining blood flow and oxygen consumption in the rat brain. *Acta Physiol Scand* 96:72–82, 1976
19. Lassen NA, Feinberg I, Lane MH: Bilateral studies of cerebral oxygen uptake in young and aged normal subjects and in patients with organic dementia. *J Clin Invest* 39:491–500, 1960
20. Alexander SC, Wollman H, Cohen PJ, et al: <sup>85</sup>Kr and nitrous oxide uptake of the human brain during anesthesia. *ANESTHESIOLOGY* 25:37–42, 1964
21. Lassen NA, Klee A: Cerebral blood flow determined by saturation and desaturation with Krypton<sup>85</sup>: An evaluation of the validity of the inert gas method of Kety and Schmidt. *Circ Res* 16:26–32, 1965
22. Woodbury DM, Karler R: The role of carbon dioxide in the nervous system. *ANESTHESIOLOGY* 21:686–703, 1960
23. Nahas GG, Steinsland OS: Increased rate of catecholamine synthesis during respiratory acidosis. *Resp Physiol* 5:108–117, 1968
24. Carlsson A, Holmin T, Lindqvist M, et al: Effect of hypercapnia and hypocapnia on tryptophan and tyrosine hydroxylation in rat brain. *Acta Physiol Scand* 99:503–509, 1977
25. MacKenzie ET, McCulloch J, Harper AM: Influence of endogenous norepinephrine on cerebral blood flow and metabolism. *Am J Physiol* 231:489–494, 1976
26. MacKenzie ET, McCulloch J, O'Kean M, et al: Cerebral circulation and norepinephrine: Relevance of the blood–brain barrier. *Am J Physiol* 231:483–488, 1976
27. Berntman L, Dahlgren N, Siesjö BK: Influence of intravenously administered catecholamines on cerebral oxygen consumption and blood flow in the rat. *Acta Physiol Scand* 104:101–108, 1978
28. Taylor KM, Laverty R: The effect of chlordiazepoxide, diazepam and nitrazepam on catecholamine metabolism in regions of the rat brain. *Eur J Pharmacol* 9:296–301, 1969
29. Corrodi H, Fuxe K, Lindbrink P, et al: Minor tranquilizers, stress and central catecholamine neurons. *Brain Res* 29:1–16, 1971
30. Berntman L, Carlsson C, Siesjö BK: Influence of propranolol on cerebral metabolism and blood flow in the rat brain. *Brain Res* 151:220–224, 1978
31. Hägerdal M, Harp J, Nilsson L, et al: The effect of induced hypothermia upon oxygen consumption in the rat brain. *J Neurochem* 24:311–316, 1975
32. Eklöf B, MacMillan V, Siesjö BK: The effect of hypercapnic acidosis upon the energy metabolism of the brain in arterial hypotension caused by bleeding. *Acta Physiol Scand* 87:1–14, 1973
